# Supplementary material for: Organic crystals absorb hydrogen gas under mild conditions
Source: Royal Society of Chemistry journal article supplement (doi:10.1039/b511341e), 2005-01-01
Supplement: b511341e.pdf [file b511341e.pdf]

## Supplementary Information

The structures of *p*-*tert*-butylcalix[4]arene and *p*-*tert*-pentylcalix[4]arene has been published before. The sublimed structure of *p*-*tert*-octylcalix[4]arene was determined by small-molecule X-ray diffraction method as described below.

### Data collection, structure solution and refinement:

X-Ray intensity data were measured at 173 K on a Bruker SMART 1000 CCD diffractometer (MoK $\alpha$ , graphite monochromator). Empirical absorption corrections were applied (SADABS). The structures were solved by direct methods (SHELXS-97). In each case, the model was expanded by difference electron density synthesis and refined by full-matrix least-squares against  $F^2$  using all data (SHELXL-97). Where possible, hydrogen atoms were included in calculated positions as riding atoms except where noted.

**Crystal data for Octyl:** C<sub>60</sub>H<sub>88</sub>O<sub>4</sub>,  $M = 873.30$ , colorless prism,  $0.25 \times 0.25 \times 0.20$  mm<sup>3</sup>, monoclinic, space group  $P2_1/c$  (No. 14),  $a = 11.3633(17)$ ,  $b = 38.624(6)$ ,  $c = 12.6614(19)$  Å,  $\beta = 101.881(2)^\circ$ ,  $V = 5438.0(14)$  Å<sup>3</sup>,  $Z = 4$ ,  $D_c = 1.067$  g/cm<sup>3</sup>,  $F_{000} = 1920$ , MoK $\alpha$  radiation,  $\lambda = 0.71073$  Å,  $T = 173(2)$ K,  $2\theta_{\max} = 54.3^\circ$ , 47813 reflections collected, 12034 unique ( $R_{\text{int}} = 0.0919$ ). The structure was solved and refined using the programs SHELXS-97 (Sheldrick, 1990) and SHELXL-97 (Sheldrick, 1997) respectively. The program X-Seed (Barbour, 1999) was used as an interface to the SHELX programs, and to prepare the figures. Final  $Goof = 1.057$ ,  $R1 = 0.0786$ ,  $wR2 = 0.1791$ ,  $R$  indices based on 6101 reflections with  $I > 2\sigma(I)$  (refinement on  $F^2$ ), 738 parameters, 30 restraints.  $Lp$  and absorption corrections applied,  $\mu = 0.064$  mm<sup>-1</sup>. Two octyl groups were disordered over two positions and modeled accordingly. All four hydroxyl hydrogen atoms were also modeled as disordered over two positions each.
